# Supplementary material for: Concurrent TSHR mutations and DIO2 T92A polymorphism result in abnormal thyroid hormone metabolism
Source: PubMed Central journal article supplement (PMC6031622; doi:10.1038/s41598-018-28480-0), 2018-07-04
Supplement: 41598_2018_28480_MOESM1_ESM.pdf [file 41598_2018_28480_MOESM1_ESM.pdf]

## Supplimentary data

### Concurrent *TSHR* mutations and *DIO2* T92A polymorphism result in abnormal thyroid hormone metabolism

Eunkuk Park<sup>1,2\*</sup>. **Ph.D.** (eunkuk0815@daum.net)

Jaehoon Jung<sup>3\*</sup>. **M.D., Ph.D.** (taesikjung@gmail.com)

Osamu Araki<sup>4</sup>. **M.D.** (oaraki@unma-u.ac.jp)

Katsuhiko Tsunekawa<sup>4</sup>. **M.D.** (ktsune@gunma-u.ac.jp)

So Young Park<sup>5</sup>. **M.D., Ph.D.** (mailbox00@hanmail.net)

Jeonghyun Kim<sup>1,2</sup>. **Ph.D.** (danbi37kjh@daum.net)

Masami Murakami<sup>4</sup>. **M.D., Ph.D.** (mmurakam@gunma-u.ac.jp)

Seon-Yong Jeong<sup>1,2\*\*</sup>. **Ph.D.** (jeongsy@ajou.ac.kr)

Sihoon Lee<sup>6\*\*</sup>. **M.D., Ph.D.** (shleemd@gachon.ac.kr.)

<sup>1</sup>Department of Medical Genetics, Ajou University School of Medicine, Suwon, Republic of Korea;

<sup>2</sup>Department of Biomedical Sciences, Ajou University Graduate School of Medicine, Suwon, Republic of Korea;

<sup>3</sup>Department of Internal medicine, Gyeongsang Institute of Health Science, Gyeongsang National University School of Medicine and Gyeongsang National University Changwon Hospital, Changwon, Republic of Korea;

<sup>4</sup>Department of Clinical Laboratory Medicine, Gunma University Graduate School of Medicine, Maebashi, Japan;

<sup>5</sup>Department of Internal Medicine, Cheil General Hospital and Women's Healthcare Center, Dankook University College of Medicine, Seoul, Republic of Korea;

<sup>6</sup>Department of Internal Medicine and Laboratory of Genomics and Translational Medicine, Gachon University School of Medicine, Incheon, Republic of Korea.

\*E.P and J.J contributed equally to this work.

\*\* Addresses correspondence to: **Sihoon Lee, M.D., Ph.D.** Associate Professor. Department of Internal Medicine, Gachon University School of Medicine. 774-21 Namdongdae-ro, Namdong-gu, Incheon 21565, Korea. Tel: +82-32-458-2662, Fax: +82-32-460-2381, E-mail: shleemd@gachon.ac.kr.

**Seon-Yong Jeong, Ph.D.** Associate Professor. Department of Medical Genetics, Ajou University School of Medicine. 164 Worldcup-ro, Yeongtong-gu, Suwon 16499, Korea. Tel: +82-31-219-4520. Fax: +82-31-219-4521. E-mail: jeongsy@ajou.ac.kr.

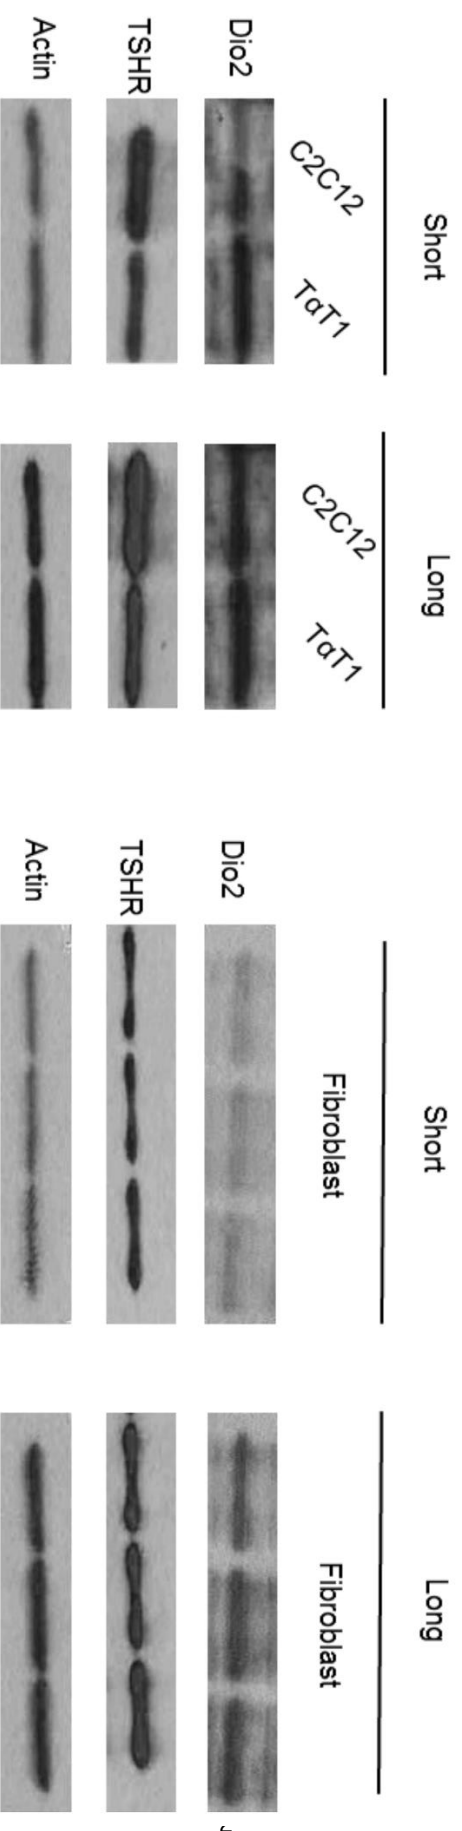

Multiple exposures of Western blot analysis of DIO2 and TSHR in C2C12 and TaT1 cell lines (left panel) and primary-cultured skin fibroblast cells (right panel).

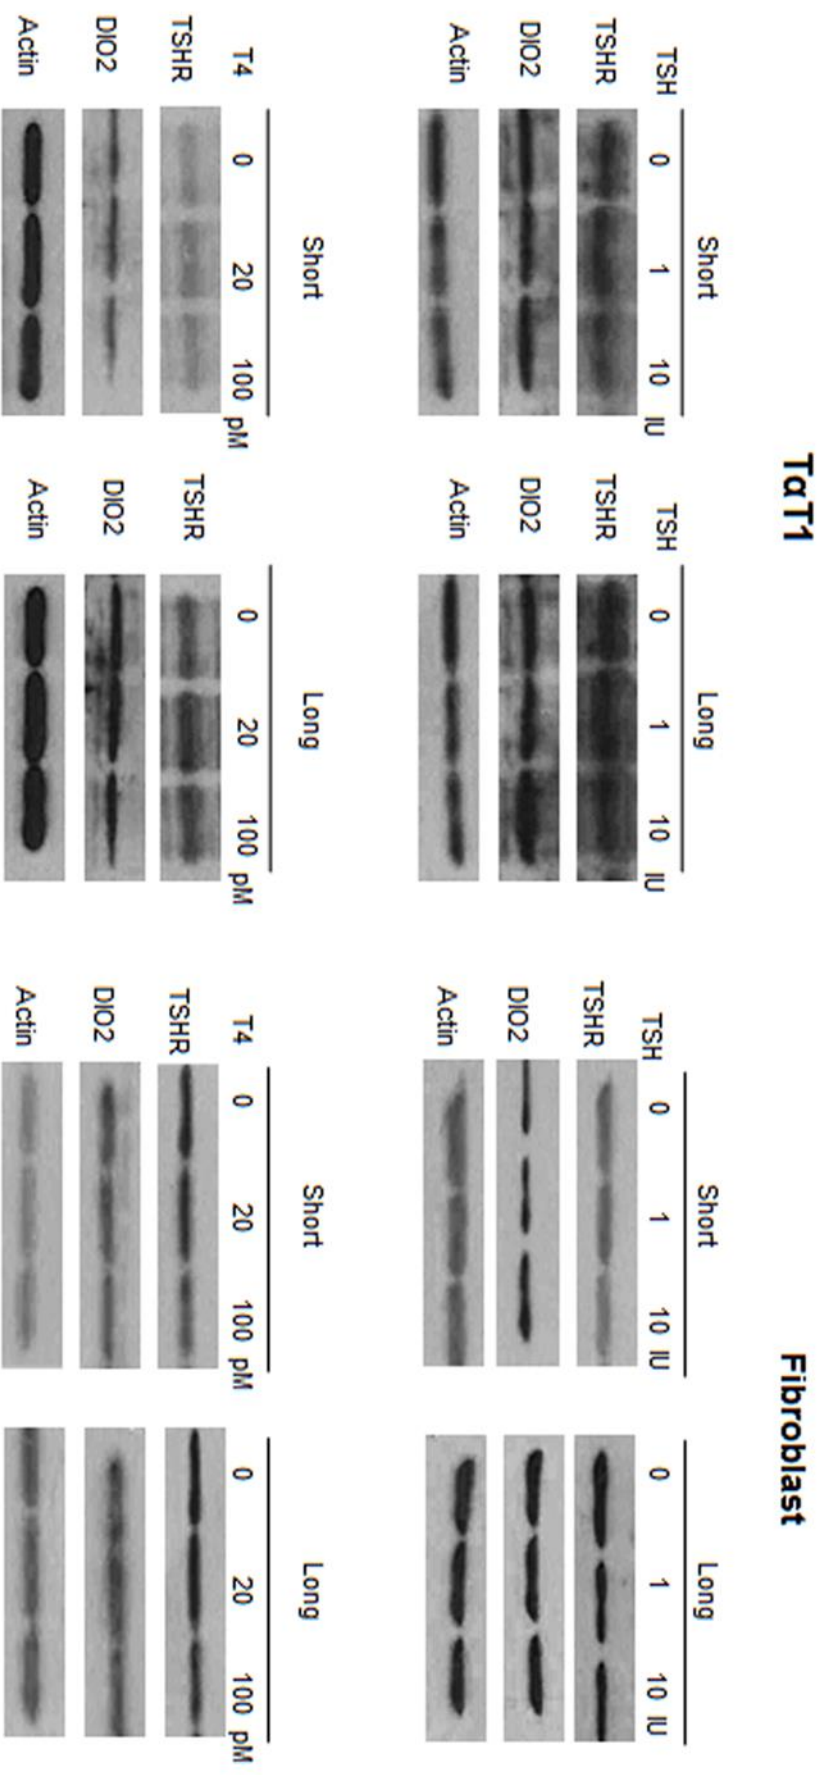

Multiple Western blot analysis of TSHR and DIO2 in TαT1 cell line and primary-cultured skin fibroblast cells incubated with indicated concentrations of either TSH (1 and 10 IU) or L-T4 (20 and 100 pM) for 8 h.
